# Supplementary material for: From Hop to Beer: Influence of Different Organic Foliar Fertilisation Treatments on Hop Oil Profile and Derived Beers’ Flavour
Source: MDPI journal article supplement (doi:10.3390/plants12091861), 2023-04-30

## Supplementary Material S1

**Figure S1.** Overlaid chromatograms of the GC-MS analysis on hop essential oils with Internal Standard (I.S.) highlighted. Each different line color correspond to a different treatment.

Legend:

CF3 (black line)= Control

T1F2 (red line)= T1 treatment

T2F1 (green line)= T2 treatment

T3F3 (blue line)= T3 treatment

T4F1 (ocher line)= T4 treatment

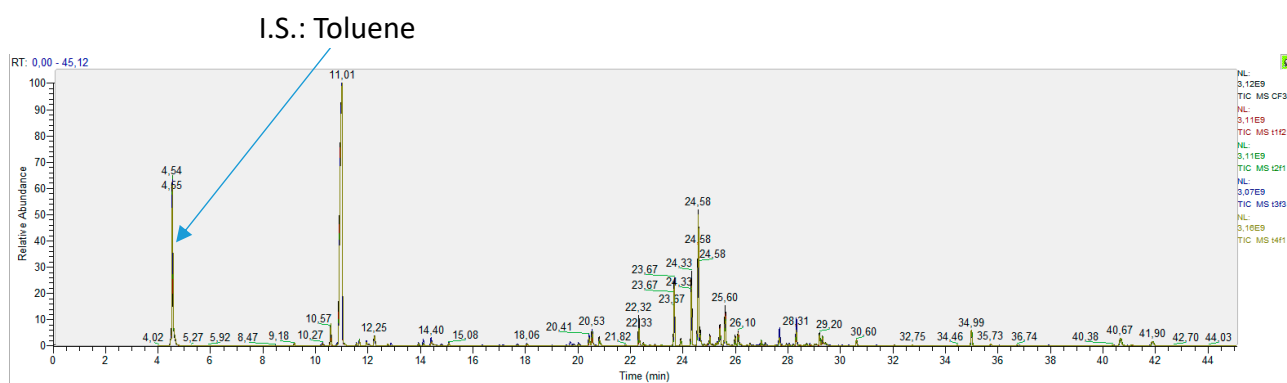

**Figure S2.** Overlaid chromatograms of the HS-SPME-GC-MS analysis on beers with Internal Standard (I.S.) highlighted. Each different line color correspond to a different treatment.

Legend:

BC (green line)= Beer with hop from control

BT1 (black line)= Beer with hop from treatment 1

BT2 (blue line)= Beer with hop from treatment 2

BT3 (red line)= Beer with hop from treatment 3

BT4 (ocher line)=Beer with hop from treatment 4

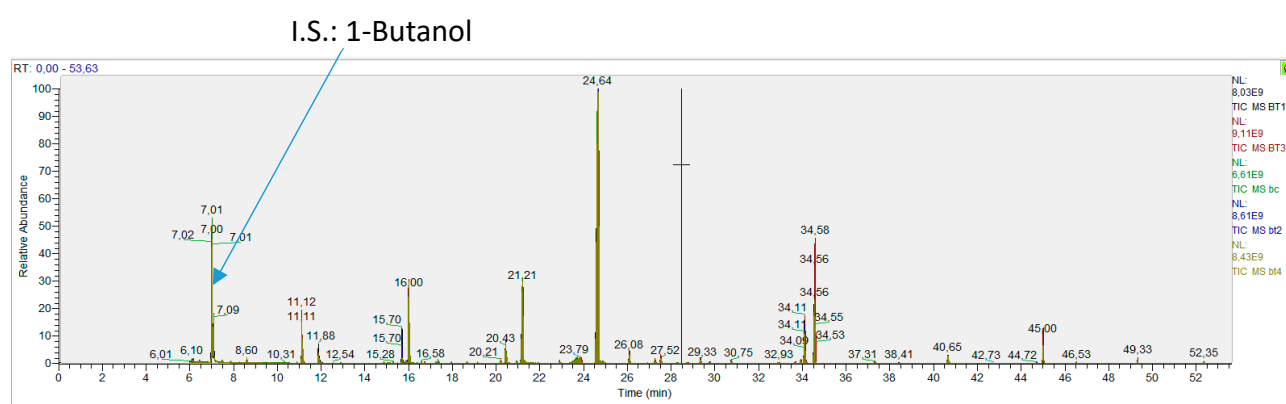

**Figure S3.** Chromatograms detail of the differences in Myrcene content in beer samples. The highest peak is owned by BT3 (in black), the lowest peak correspond to BT4 (in other).

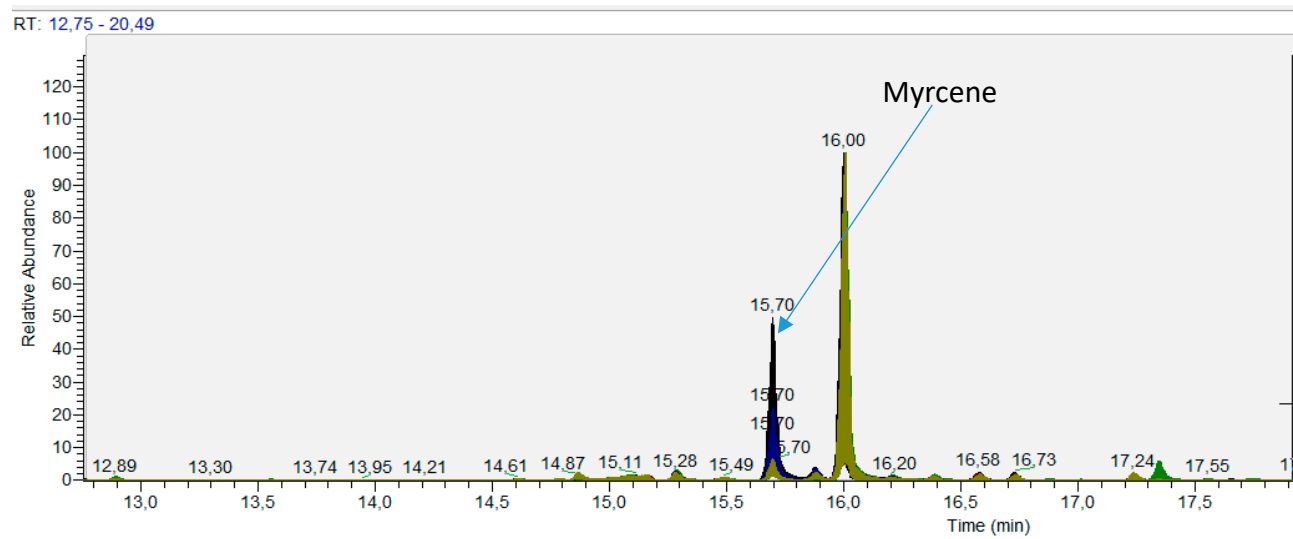

Supplement: s1 [file s1]
