# Supplementary material for: From Hop to Beer: Influence of Different Organic Foliar Fertilisation Treatments on Hop Oil Profile and Derived Beers’ Flavour
Source: Plants (Basel). 2023 Apr 30;12(9):1861. doi: 10.3390/plants12091861 (PMC10180877; doi:10.3390/plants12091861)
Supplement: Supplementary file 1 [file plants-12-01861-s001.zip]

Archive with 5 entries (5 files):
- Figure S1_chromatograms.pdf
- Figure S2_Meteorological data.png
- TABLE S1_fertilizers_rev.xlsx
- Table S2_e-nose PCAs variability.xlsx
- Table S3_e-nose outputs.xlsx
