# Supplementary material for: From Hop to Beer: Influence of Different Organic Foliar Fertilisation Treatments on Hop Oil Profile and Derived Beers’ Flavour
Source: Plants (Basel). 2023 Apr 30;12(9):1861. doi: 10.3390/plants12091861 (PMC10180877; doi:10.3390/plants12091861)
Supplement: Supplementary file 1 [file plants-12-01861-s001.zip › TABLE S1_fertilizers_rev.xlsx]

## Sheet: Foglio1
Commercial names and compositions (w/w) of the organic fertilizers used in the experiment. In the right are reported the mix of organic fertilizer per treatment applied in two times: t1 (between the emission of lateral shoots and the start of blooming) and t2 (between 50% blooming and the end of blooming) [22].
FERTILIZER COMMERCIAL NAME: ALGA P		Mix of organic fertilizer per treatment
Algae extract (Ascophyllum nodosum) (N) 1%		Fetilization treatment T1: ALGA P + M140 (t1) and K-L + MAGNESIO P (t2)
K2O 19 %		Fetilization treatment T2: FERTAMIN FOGLIARE + ALGA P (t1) and MAGNESIO P + M140 (t2)
Betaine 0.1 %		Fetilization treatment T3: FERTI COMBI + FE 118 + ALGA P (t1) and MAGNESIO P + FOSFIT L (t2)
Mannitol 4 %		Fetilization treatment T4: FERTI COMBI + FE 118 + M140 (t1) and ALGA P (t2)
Carbon (C) organic 20 %
FERTILIZER COMMERCIAL NAME: M.140
Boro (B) water soluble 0.5 %
(Cu) water soluble 1.5 %
(Cu) with EDTA 1.5 %
(Fe) water soluble 4 %
(Fe) chelate with EDTA 4 %
(Mn) water soluble 4%
(Mn) chelate with EDTA 4%
(Mo) water soluble 0.1 %
(Zn) water soluble 1.5 %
(Zn) chelate with EDTA 1.5 %
FERTILIZER COMMERCIAL NAME: K-L
(K2O) water soluble. 20 %
(P2O5) water soluble 15 %
(B) water soluble 0.2 %
(Mo) water soluble 0.2 %
FERTILIZER COMMERCIAL NAME: Magnesio P
(Mg) chelate with EDTA 6%
FERTILIZER COMMERCIAL NAME: Fertamin L fogliare
(N) tot 9%
(N) organic 9%
(C) organic 30.5%
FERTILIZER COMMERCIAL NAME: Fe.118
(Fe) water soluble 6%
(Fe) chelate with EDDHA 6%
FERTILIZER COMMERCIAL NAME: FERTI COMBI
(N) organic 5.35 %
(K2O) water soluble 5.4 %
(C) organico di origine biologica 21 %
(Cu) water soluble 0.002 %
(Cu) chelato con EDTA 0.002 %
(Fe) water soluble 0.05 %
(Fe) chelate with EDTA 0.05 %
(Zn) water soluble.0.007 %
(Zn) chelato con EDTA 0.007 %
FERTILIZER COMMERCIAL NAME: FOSFIT L
P2O5 water soluble 30%
K2O water soluble 20%
