# Supplementary material for: From Hop to Beer: Influence of Different Organic Foliar Fertilisation Treatments on Hop Oil Profile and Derived Beers’ Flavour
Source: Plants (Basel). 2023 Apr 30;12(9):1861. doi: 10.3390/plants12091861 (PMC10180877; doi:10.3390/plants12091861)
Supplement: Supplementary file 1 [file plants-12-01861-s001.zip › Table S2_e-nose PCAs variability.xlsx]

## Sheet: PCA supplementay informations
Variable informations GC-MS:
Variable informations e-nose: HOPS
	F1	F2	F3	F4
S1	0.119298	0.239944	0.13736	0.025212
S2	0.132038	0.229095	0.155161	0.0320564
S3	0.0791504	0.264198	0.0844437	0.0101969
S4	0.220353	0.101019	-0.210238	-0.142226
S5	0.100252	-0.160299	0.370477	-0.0485424
S6	0.10549	-0.197383	0.3017	-0.0102222
S7	0.242834	0.0146931	-0.221294	-0.03058
S8	0.0395522	0.273927	0.0751622	-0.0455962
S9	0.138713	0.207373	0.217909	0.062082
S10	0.210984	-0.143465	0.179651	0.0543798
S11	0.144701	0.232483	-0.0460539	0.104478
S12	0.197299	0.189955	-0.0467019	0.0276094
S13	0.147175	0.170306	0.293359	0.0334474
S14	0.171645	0.216435	0.0250119	0.00317768
S15	0.265136	-0.0520987	0.00618645	-0.0524417
S16	0.253992	0.00091403	-0.174413	-0.0176873
S17	0.109852	-0.207734	0.213762	0.249997
S18	0.0788719	-0.267121	0.0160062	-0.0662432
S19	0.254647	-0.0231478	-0.16559	0.0218094
S20	0.239981	-0.111933	-0.0970566	0.0995495
S21	0.0716804	-0.159707	-0.123913	0.557552
S22	-0.0526779	-0.225328	-0.104631	-0.395404
S23	0.161771	-0.199632	0.0134518	-0.277705
S24	0.123636	-0.233887	-0.0303288	-0.229752
S25	0.23074	0.12667	0.101145	-0.128568
S26	0.0355807	-0.244972	0.0329063	0.350812
S27	0.250964	-0.0544462	-0.153398	0.0773484
S28	0.222858	-0.135038	-0.150647	0.0316401
S29	0.0720177	-0.0805588	0.442335	-0.223892
S30	0.202235	-0.139964	0.180423	0.193974
S31	0.243591	-0.0955124	-0.0399828	-0.195485
S32	0.244088	0.0829603	-0.15519	-0.0539418
Variable informations e-nose: BEERS
	F1	F2	F3	F4
S1	0.224002	0.109202	-0.00702039	-0.111899
S2	0.225727	0.102928	-0.00545132	-0.106503
S3	0.223966	0.113339	-0.0106053	-0.0996196
S4	0.22226	0.117382	-0.0161759	-0.109248
S5	0.184133	-0.223034	-0.00072281	0.0996662
S6	0.174601	-0.238991	-0.0158854	0.103018
S7	0.231189	0.0776275	0.0260194	-0.0852663
S8	0.221639	0.120993	-0.0236585	-0.103971
S9	0.2334	0.0656533	-0.00463129	-0.0808859
S10	0.20947	-0.173015	0.00371298	0.0448539
S11	0.229539	0.0880286	-0.00260226	-0.0911009
S12	0.23859	0.0212902	-0.00980239	-0.0403993
S13	0.23577	0.0391407	-0.0122946	-0.0841102
S14	0.232108	0.0748744	-0.00603425	-0.0819228
S15	0.209497	-0.17148	-0.0190303	0.0538429
S16	0.235733	-0.0640258	-0.00880042	-0.00595019
S17	0.0918991	-0.303431	-0.173654	0.0840906
S18	-0.0127561	0.34074	-0.0134607	0.195637
S19	-0.134358	-0.245272	0.213437	-0.109946
S20	-0.181919	-0.0175857	0.206929	-0.298662
S21	0.0887815	-0.182076	0.0700722	0.465046
S22	-0.0072615	-0.0881547	0.436887	-0.228781
S23	0.0127224	-0.306064	-0.0565931	-0.31163
S24	0.00344768	-0.17676	0.354243	0.294477
S25	0.157327	0.146258	-0.240015	0.245562
S26	-0.0479289	-0.328962	-0.168824	-0.0579205
S27	0.0194678	-0.207985	-0.252319	-0.38136
S28	0.17696	-0.242511	0.0209402	-0.0144816
S29	0.148214	0.140224	0.30995	-0.154609
S30	0.0812173	-0.0493769	0.454738	-0.0313748
S31	0.182885	-0.223573	-0.00547125	0.110201
S32	0.163838	0.0446468	0.317822	0.187192
