# Supplementary material for: From Hop to Beer: Influence of Different Organic Foliar Fertilisation Treatments on Hop Oil Profile and Derived Beers’ Flavour
Source: Plants (Basel). 2023 Apr 30;12(9):1861. doi: 10.3390/plants12091861 (PMC10180877; doi:10.3390/plants12091861)
Supplement: Supplementary file 1 [file plants-12-01861-s001.zip › Table S3_e-nose outputs.xlsx]

## Sheet: E-NOSE
SAMPLE	S1	S2	S3	S4	S5	S6	S7	S8	S9	S10	S11	S12	S13	S14	S15	S16	S17	S18	S19	S20	S21	S22	S23	S24	S25	S26	S27	S28	S29	S30	S31	S32
T1	0.0042555	0.0027162	0.0026269	0.0015234	0.001835	-0.000237	0.0005141	0.0013991	0.0038399	0.0006914	0.0034317	0.0017404	0.0010195	0.000942	0.0009405	0.0007524	-0.0001763	-0.0003473	0.0001308	-0.0001927	-7.67e-05	2.72e-05	-0.0007269	-0.0001596	-0.0003898	-0.0003368	-0.0003226	-0.0004804	-0.0004332	-0.0003311	-0.0019007	-0.0001822
T1	0.0055438	0.0037769	0.003373	0.0025255	0.0067119	0.0018707	0.001196	0.0019942	0.0053995	0.0017071	0.0048701	0.0027033	0.001266	0.0013249	0.0023942	0.001301	-0.0001146	-0.0004921	-0.000108	-0.0002914	8.18e-05	5.48e-05	-0.0005	8.53e-05	-0.0002058	-0.0005329	-0.0003371	-0.000544	-0.0003349	-0.0003067	-0.0014241	-0.0004204
T1	0.0136133	0.0095431	0.0097725	0.007595	0.0080784	0.0023532	0.0050078	0.0055826	0.013085	0.0041874	0.0138904	0.0081193	0.0029039	0.0039045	0.0052857	0.003651	-0.0001216	0.0005293	0.0008964	0.0005218	7.5e-05	0.0001586	0.0004116	0.0002069	9.44e-05	0.0015295	0.0016246	0.0014758	-0.0002756	0.0002461	-0.0007338	0.0005222
T1	0.005539	0.0039787	0.0034677	0.0020646	0.0069811	0.0019307	0.0019336	0.002026	0.0057	0.0019233	0.004722	0.0028576	0.001362	0.0013644	0.002441	0.0012889	-0.0001202	-0.0004524	0.000111	-6.95e-05	0.0001378	-0.0002162	-0.0004238	0.0002365	-0.0003059	-0.0007987	-0.0001944	-0.0004772	-0.0002704	-0.0003081	-0.0014988	-0.0002113
T1	0.0054353	0.0040039	0.004014	0.0031649	0.0079872	0.0029936	0.0040354	0.0024729	0.0056791	0.002328	0.0051922	0.0029855	0.0013135	0.0014909	0.0027695	0.001456	-0.0002649	-0.0007657	-0.0015557	-0.0010382	-0.0001298	0.0001164	-0.0025943	-0.001467	0.0001101	-0.0014809	-0.0022514	-0.0017507	-0.000491	-0.0010631	-0.0021922	-0.0013836
T2	0.0082701	0.0056687	0.0053145	0.0034088	0.0074999	0.0020642	0.0022683	0.0028883	0.0082961	0.0024495	0.0071642	0.003947	0.0020045	0.0020923	0.0029444	0.0017278	-0.0001796	0.0001469	-0.0001646	-0.0001746	7.26e-05	-0.0001278	-0.0003739	0.000176	0.000175	-0.0005912	5.31e-05	-0.0002998	-0.000221	0.0003238	-0.0012528	-0.000265
T2	0.0047633	0.0032743	0.0029899	0.0021073	0.0070136	0.0020686	0.0014483	0.0017342	0.0049636	0.0018336	0.0040209	0.0024595	0.0012386	0.0013126	0.0024217	0.0012252	-0.0001597	-0.000143	7.66e-05	-0.0001152	6.83e-05	-0.0001808	-0.00035	0.0001945	0.0001723	0.0003898	5.51e-05	-0.0004697	8.4e-05	-0.0003613	-0.0010382	-0.0002959
T2	0.0127291	0.0087436	0.0081653	0.0049982	0.0097988	0.0024586	0.0034778	0.0047497	0.0127721	0.0031363	0.0108771	0.0061069	0.002929	0.0030506	0.0042811	0.0024601	-3.51e-05	-0.0002861	-2.69e-05	6.73e-05	-8.34e-05	0.0001345	0.0002377	-2.58e-05	-0.0005599	-0.0004086	-0.0001301	-0.0004143	-0.0002632	-0.0002623	0.0001649	-0.0003682
T2	0.0052917	0.0035795	0.0032487	0.0018814	0.008354	0.00241	0.0009634	0.0017213	0.0053401	0.0020852	0.0042278	0.0027825	0.0013162	0.0012764	0.0028738	0.0013335	9.58e-05	-0.000213	-0.0001698	6.26e-05	9.62e-05	7.34e-05	-0.0003477	0.0001672	-0.0002888	-0.000545	-0.0001055	-0.0006237	0.0001781	-0.0001989	-0.0007378	-0.0002134
T2	0.0095937	0.006675	0.0060807	0.0036708	0.0086345	0.0022552	0.0027695	0.0034941	0.0094193	0.0029216	0.0079514	0.004619	0.0022637	0.0023222	0.0033102	0.0018845	0.0001478	-0.0018317	0.0003731	0.0002347	8.29e-05	-0.0034692	-0.0051681	-0.0035331	0.0002146	0.0002733	-0.0004787	-0.0005031	-0.0007048	0.0001666	-0.0054458	7.51e-05
T3	0.0047842	0.0036639	0.0030472	0.0019986	0.0119861	0.0034713	0.0010783	0.0016662	0.0054048	0.0026629	0.0045167	0.0027984	0.0013709	0.0012337	0.0035691	0.0014817	0.0001473	-0.0001486	8.88e-05	-0.0001046	-9.38e-05	9.83e-05	-0.0005316	-0.0003776	8.07e-05	-0.0003463	-0.0006163	-0.0004996	0.0002805	0.0001315	5.17e-05	-0.0003327
T3	0.0092349	0.0062332	0.0062506	0.0043363	0.0074683	0.0018662	0.0032779	0.0035279	0.0091065	0.0021735	0.007348	0.0042867	0.0022283	0.0022697	0.003147	0.0017443	5.94e-05	-0.0001076	-0.0002513	0.0001628	-7.68e-05	-0.0001545	0.0005977	0.0003271	0.0003081	-0.0004895	0.0002711	-0.0004186	-0.0002062	-0.0002079	-0.0007608	0.0001792
T3	0.0089599	0.0060875	0.0054015	0.0036081	0.0089847	0.0022788	0.0019064	0.0033019	0.0088372	0.0026177	0.0070705	0.0042209	0.0021484	0.0022699	0.003306	0.001904	-0.0001131	-0.0001388	6.42e-05	5.78e-05	3.49e-05	-0.0001566	-0.0003372	0.0001253	-0.0001877	0.0001872	-0.0002166	5.97e-05	0.000267	0.0002311	-0.0010543	-0.0002517
T3	0.0056071	0.0040237	0.0035131	0.0023893	0.0124763	0.0035244	0.0016344	0.0019424	0.0059944	0.0029046	0.0051085	0.0031038	0.0015714	0.0014649	0.0038883	0.0014786	-0.0001806	-0.0002851	-0.0001812	-0.0001158	8.97e-05	-7.7e-05	0.0002468	-0.0001535	-0.0001396	-0.0007475	1.03e-05	-0.0003679	-0.0002837	-0.000158	-0.0011601	-0.0003155
T3	0.0105557	0.0071237	0.0066204	0.0043	0.0095736	0.0025377	0.0023777	0.0037689	0.0103089	0.002821	0.008522	0.0047913	0.002423	0.0025059	0.0036973	0.0020388	-8.05e-05	-0.0002468	8.81e-05	-0.0001516	-6.12e-05	-0.000164	-0.0006805	8.91e-05	-0.0001653	-0.0004175	-0.0007063	-0.0005238	0.0003135	-0.0003284	-0.001174	-0.0004249
T4	0.0117518	0.0078335	0.007341	0.004918	0.0060496	0.0011541	0.0029796	0.0041612	0.0113803	0.0023468	0.0093992	0.005537	0.002662	0.0027423	0.003141	0.0019359	-0.0002303	-0.0005294	0.0001349	-0.0002364	8.09e-05	-0.0004728	-0.000464	-0.0002551	-5.6e-05	-0.0002934	-0.0003599	-0.0005226	-0.0002051	-0.0004671	-0.0015168	-0.0001999
T4	0.0043083	0.0032132	0.003385	0.0028712	0.0058083	0.0018099	0.0017113	0.0016745	0.0041035	0.0018668	0.0034513	0.0022299	0.0009507	0.0009763	0.001852	0.0010402	-0.0004084	-0.0006512	0.0003732	0.0002735	-0.0002348	-0.0016416	-0.0040409	-0.0026877	0.0001788	-0.0015738	-0.0019705	-0.00159	-0.0003982	0.0003929	-0.0025436	0.0004361
T4	0.0140746	0.0090943	0.0086116	0.005546	0.0075409	0.0015181	0.0034316	0.0051803	0.0133862	0.0026557	0.0111632	0.0065689	0.0029863	0.003281	0.0038624	0.0023449	-0.0001806	-0.0003604	-1.97e-05	-0.0002575	-7.06e-05	-0.0001363	-0.0002945	-0.0002101	0.0002282	0.0001304	-0.0001556	-0.0003618	-0.0002652	0.0004856	-0.001359	-0.000173
T4	0.0038201	0.0025158	0.0023658	0.0016426	0.00405	0.0012753	0.0016159	0.0013411	0.0036616	0.0011936	0.0029237	0.0017089	0.0010144	0.0010345	0.0017133	0.0009481	-0.0002316	-0.0012987	3.97e-05	-0.0021876	-0.0001221	-0.0011616	-0.002847	-0.0022629	-0.0002513	-0.0022193	6.08e-05	-0.0027917	-0.0001594	-0.0017775	-0.0027974	9.12e-05
T4	0.0115174	0.0078213	0.0071794	0.0046992	0.0056689	0.0011135	0.0027364	0.004288	0.0110316	0.0020735	0.0094011	0.0053669	0.0025858	0.0030401	0.0033191	0.0021721	-0.00039	-0.0020332	-0.0018955	-0.0016201	8.44e-05	-0.0004481	-0.0008502	0.000228	-9.11e-05	-0.0007966	-0.0007485	-0.0012059	-0.0002938	-0.0009033	-0.0015007	0.0002325
C	0.0060747	0.0041779	0.0035395	-0.005326	0.004906	0.0010996	-0.0212798	0.0023298	0.0058742	0.0011608	0.0041916	0.0018685	0.0013557	0.001449	-0.0045822	-0.0037151	-0.0003111	-0.0008776	-0.0074114	-0.0059765	-9.68e-05	-0.0006593	-0.0067783	-0.0045238	-0.0002772	-0.0010581	-0.0065645	-0.0063528	-0.0002843	-0.0008463	-0.008131	-0.0042672
C	0.005543	0.0040125	0.0054751	0.005174	0.0070742	0.0020082	0.0052878	0.0030328	0.0054502	0.0021615	0.0069552	0.0040313	0.0013579	0.0014011	0.0035178	0.0021187	-0.000212	-0.0006897	0.0006695	0.0005137	9.69e-05	-0.0001248	0.0019255	0.001303	6.98e-05	-0.0007882	0.0012422	0.0013705	-0.0002868	-0.0012566	-0.0014683	-0.0002105
C	0.0102991	0.0070958	0.0065371	0.004337	0.0089636	0.0023144	0.0024389	0.0039025	0.0104951	0.0023271	0.0083155	0.0052416	0.002507	0.0024543	0.0037125	0.002073	-0.000104	-0.0002462	-0.000104	-0.000247	6.55e-05	-6.74e-05	-0.0002614	3.07e-05	-0.0003462	0.000435	-0.0001674	-0.0005838	-0.0001691	0.0001728	-0.0011089	-0.0002099
C	0.0057984	0.0040398	0.0037451	0.002259	0.0072291	0.0020353	0.0013012	0.0021811	0.0058211	0.0018042	0.005102	0.002822	0.0013803	0.001459	0.0026928	0.0013768	0.0001144	-0.0002043	0.0001075	0.0001572	-6.77e-05	6.1e-06	-0.0012615	0.0001822	-0.0001904	0.0005418	0.0003624	-0.000603	-0.0003323	0.0001257	-0.0015212	-0.0005806
C	0.0091578	0.0061128	0.0053142	0.0033245	0.0088249	0.0020131	-0.0068182	0.0030082	0.0089955	0.0022784	0.006847	0.0031756	0.0021574	0.0020204	0.0026732	0.0012674	-0.0003543	-0.0012278	-0.0029335	-0.0025162	-0.0001418	-0.0006742	-0.0024997	-0.0014678	-0.0001688	-0.0016037	-0.0042596	-0.0044118	0.0002896	-0.0006032	-0.0032271	-0.0014158
BT1	0.0094375	0.0062962	0.0062949	0.0035626	0.0149945	0.0042142	0.0025133	0.0033789	0.0101857	0.0035958	0.0081489	0.0053521	0.0024929	0.0026132	0.0049079	0.002403	9.98e-05	-0.0002754	1.12e-05	-0.0001222	8.66e-05	-0.0002316	-0.0003108	0.0001801	0.000186	-0.0006757	0.0001549	-0.0003461	-0.0001089	-0.000234	0.0001376	-0.0002433
BT1	0.0079462	0.0051506	0.0051617	0.0031299	0.0089408	0.0026013	0.0019702	0.0029701	0.0080948	0.0022439	0.0066448	0.0039787	0.0019984	0.0020146	0.0033237	0.0018067	-4.15e-05	-0.000101	-0.0002128	-0.0001506	8.4e-05	-0.0002419	-0.0005333	-0.0002845	-0.000207	0.0001076	3.95e-05	-0.0004509	-0.000346	-0.0003521	0.0001323	-0.0001456
BT1	0.0100553	0.0069024	0.0066205	0.0041566	0.0154233	0.004332	0.0026282	0.0035715	0.0105544	0.0038062	0.0084459	0.0054576	0.002671	0.0026608	0.0054623	0.0025289	0.0002334	-0.0002778	-8.62e-05	-0.0001437	0.0001055	0.0001519	-0.0002426	0.0002685	9.56e-05	-0.0002056	-8.35e-05	-0.0003419	-0.0001723	0.0001934	0.0003368	-0.000142
BT1	0.0075355	0.0050652	0.0047187	0.0032993	0.0097116	0.0028846	0.0026141	0.0025316	0.007558	0.0022908	0.0058434	0.0039553	0.0018731	0.001937	0.0034712	0.0018054	8.8e-05	-0.0002555	8.94e-05	-0.0002764	7.66e-05	-0.0001459	-0.0003519	-9.75e-05	-0.0003329	0.0001514	-0.0001579	-0.0002591	-0.0002945	0.0002564	0.000257	0.0001341
BT1	0.0086392	0.0055096	0.0052869	0.0031175	0.0138407	0.0033186	0.002547	0.0028806	0.0083182	0.0032614	0.0068763	0.0042429	0.0021461	0.0020785	0.0046053	0.0021014	-0.0001835	-0.0003278	-1.81e-05	-9.78e-05	9.54e-05	8.55e-05	0.0003536	0.0001953	0.0002541	-0.0004543	-0.0001905	-0.0001982	-0.0002427	-0.0003403	0.0005308	0.0001424
BT2	0.0073173	0.0047112	0.004573	0.0028057	0.0008007	-0.000262	0.0018172	0.0026873	0.0065819	0.000899	0.0055665	0.0028481	0.0016364	0.0017201	0.0011743	0.0011897	3.23e-05	-0.0002232	-9.95e-05	-0.0001973	-0.0001994	-0.0001852	-0.0001771	-3.71e-05	-0.0001614	-0.0003233	0.0001177	-0.000331	-0.0001805	-0.0003693	-0.0010265	-0.0001939
BT2	0.0077385	0.005215	0.0050671	0.0033121	0.0093839	0.0026439	0.0020652	0.0027646	0.0076878	0.0022891	0.0060162	0.0039255	0.0019259	0.0019333	0.0035312	0.0018054	-0.0001491	-0.0003393	-0.000143	-6.92e-05	9.85e-05	-0.0001556	0.0001851	-0.0001565	0.0001317	-0.0004964	7.38e-05	-0.0004822	-0.0002635	8.2e-06	8.45e-05	-0.0001579
BT2	0.0100713	0.0066945	0.0064488	0.0041347	0.003204	0.0004926	0.0023656	0.0036834	0.0093332	0.0014454	0.0078278	0.0043011	0.0023033	0.0024107	0.0020505	0.0015947	7.36e-05	-0.0001311	-2e-05	-0.0001511	-0.0001584	-7.06e-05	-0.0001839	-0.000116	0.0001674	-0.0002965	0.0001889	-0.0004824	-0.0003798	-0.0003388	-0.0010181	-0.0003093
BT2	0.0076864	0.0047777	0.0048657	0.0030147	0.0015306	0.0001046	0.0016868	0.00269	0.0068629	0.0007985	0.0059504	0.0031182	0.0017015	0.0017255	0.0014718	0.0012105	-0.0001205	-0.0003218	6.48e-05	-9.9e-05	-5.5e-05	5.86e-05	-0.0002129	-0.0001766	-0.0001904	0.0005315	-5.3e-05	-0.00031	-0.000347	-0.000327	-0.0006172	-0.000189
BT2	0.0094781	0.0061279	0.0059664	0.0037372	0.0037708	0.0007225	0.0027444	0.00335	0.0087639	0.0013179	0.0072435	0.0040061	0.002146	0.0022937	0.0021181	0.0015718	7.69e-05	-0.0002187	-8.36e-05	-4.69e-05	-0.0001141	-0.0001195	-0.0004432	-0.0001493	-0.0001892	-0.0003724	-0.0002894	-0.0003942	-0.0001753	-0.0002278	-0.0010486	-0.0001897
BT3	0.0071286	0.0048834	0.0045143	0.0030444	0.013283	0.0036992	0.0023558	0.0024597	0.0076312	0.0031651	0.0061253	0.0038806	0.0020288	0.0018943	0.0043745	0.0019408	0.0001251	-0.0003166	-5.46e-05	-6.28e-05	-0.0001508	-0.0001069	-0.0001777	9.79e-05	-0.0001176	-0.0005503	-1.5e-05	0.0002523	-0.0001988	-0.000107	0.0001041	-0.0002214
BT3	0.008666	0.0056783	0.0053894	0.0032713	0.0129731	0.0036132	0.0025903	0.0029114	0.0087907	0.0034276	0.0068415	0.0044308	0.0022207	0.0021227	0.0043333	0.0021699	5.14e-05	-0.0002515	0.000222	-0.0002471	-3.62e-05	9.51e-05	-0.0002794	0.0001847	-0.0003192	-0.0004459	-0.0001956	-0.0002419	-0.0002214	-0.0002371	0.0001956	-0.0001037
BT3	0.0099333	0.006578	0.0062837	0.003823	0.0097101	0.0026013	0.0026078	0.0034539	0.0097238	0.0026983	0.0080488	0.0047867	0.0023098	0.0024229	0.0037203	0.0020727	-0.00011	-0.0002723	-8.07e-05	4.23e-05	-5.7e-05	4.35e-05	0.0001289	-0.0001255	-0.0001718	-0.0003144	0.0001318	-0.0003987	-0.0001042	-0.0001718	0.0001362	-0.0001436
BT3	0.007087	0.0046277	0.0042915	0.0026372	0.0107246	0.0029138	0.0015373	0.0021748	0.0071826	0.002614	0.0054398	0.0036316	0.0019094	0.0018705	0.0037093	0.0017615	-3.96e-05	-0.0002526	2.12e-05	1.45e-05	8.12e-05	8.5e-05	-0.0001528	0.0001355	-0.000336	0.0003027	6.5e-05	-0.0007813	-0.0002809	0.000208	0.0001723	0.0001477
BT3	0.0088274	0.0057391	0.0055433	0.0033662	0.0121979	0.0033619	0.0027382	0.0030662	0.0088351	0.0029716	0.0072908	0.0043131	0.002348	0.0022841	0.0043779	0.0020961	0.0001503	-0.0002939	5.92e-05	-0.0001214	9.49e-05	-0.0001992	0.0001361	-9.75e-05	-0.0002148	0.0003931	4.71e-05	-0.0002562	-0.0001389	0.0002984	0.0001614	-0.0001453
BT4	0.0131331	0.0085775	0.0083482	0.0053248	0.0052881	0.0010007	0.0033935	0.0044704	0.0122226	0.0019514	0.0103795	0.0056232	0.0029643	0.0032503	0.0028114	0.0022401	-9.8e-05	-0.0001176	-0.0002575	-7.18e-05	5.84e-05	-0.0002265	-0.0003656	-0.0001833	0.0002154	-0.0003425	-0.0002195	-0.0002408	-0.0001835	-8.24e-05	-0.0007474	-0.000115
BT4	0.0149946	0.0100998	0.0097947	0.0058375	0.0094532	0.00215	0.0039037	0.0052699	0.0146374	0.0030074	0.0125246	0.0070571	0.0035656	0.0036639	0.0042977	0.0027549	-6.2e-06	-0.00027	-0.0001137	-0.0001222	-0.0001709	-0.0001117	-0.0001605	-5.67e-05	-0.0002389	-0.000385	-0.0001371	-0.0005284	-0.0003201	0.0002524	-0.0007217	0.0001917
BT4	0.0156244	0.0102512	0.0099233	0.0063085	0.0086354	0.0019365	0.0039919	0.0057394	0.0149659	0.0030035	0.0126695	0.0069233	0.0035593	0.0036861	0.0042019	0.0027093	-9.82e-05	-0.0002228	-3.29e-05	-0.0001547	2.08e-05	-6.71e-05	-0.0002598	0.0001284	-8.28e-05	-0.0004391	7.56e-05	-0.0004526	0.0002228	-0.0004174	0.0002491	9.5e-05
BT4	0.0130379	0.0088606	0.0087181	0.0055068	0.0049501	0.0008846	0.0030472	0.0048394	0.0124033	0.0022742	0.0106131	0.0057042	0.0030897	0.0031735	0.0029334	0.0020816	-0.0001686	-0.0002391	-0.0001284	-0.0001414	-4.94e-05	-1.84e-05	-0.0003315	0.0001109	0.0001848	-0.0004944	2.99e-05	-0.0002358	0.0001179	0.0003574	-0.0006617	-0.0001068
BT4	0.0139356	0.0090182	0.0086711	0.005417	0.0078723	0.001555	0.0041356	0.004763	0.0127349	0.002538	0.010724	0.0057766	0.0029853	0.0031972	0.0035705	0.0024339	-0.0001318	-0.0003055	0.0001101	-0.0001501	-0.0001084	0.0001955	-0.0001492	-0.0001908	-9.79e-05	-0.0004326	3e-06	-0.0003468	-0.0002915	-0.0001783	0.000118	-9.78e-05
BC	0.0049604	0.0029533	0.0030997	0.0020562	-0.0046825	-0.0023803	0.0015158	0.0019523	0.0039967	-0.0005814	0.0033092	0.0015378	0.0008783	0.0010772	-0.0010144	0.0004704	-0.0002065	-0.0002933	9.39e-05	9.05e-05	6.92e-05	0.0001143	-0.0005371	-0.0001786	-0.0002119	-0.0003499	8.31e-05	-0.0006278	-0.0002873	-0.0004078	-0.0018566	-0.000145
BC	0.0029146	0.0017349	0.0018581	0.0009934	-0.0010914	-0.0004919	0.0011606	0.0008668	0.0025947	0.0003848	0.0021861	0.0010699	0.0005114	0.0006615	0.0003053	0.00039	-0.0001967	-0.0003418	0.0001482	7.59e-05	-0.000135	6.33e-05	-3.55e-05	0.000194	-0.0003017	0.0002463	-9.27e-05	-0.0007639	-0.0001925	-0.0003576	-0.0012405	9.08e-05
BC	0.0051875	0.0032954	0.003117	0.0021696	-0.0047458	-0.0023221	0.0010693	0.0018056	0.0041145	-0.0005749	0.0034926	0.0017087	0.0008995	0.0011382	-0.000808	0.0004315	-0.0001911	-0.000284	-6.42e-05	-0.000139	-4.79e-05	-0.0001209	-0.0002382	7.5e-06	-0.0001592	-0.0006489	-0.0001414	-0.0003636	-0.0002797	-0.0001171	-0.0019534	-0.0001398
BC	0.0027272	0.0016181	0.0016996	0.0009152	-0.0014319	-0.0007393	0.0005199	0.0007897	0.0021157	-0.0003904	0.0017222	0.0008204	0.0005289	0.0006138	-0.0003033	0.000258	-5.84e-05	-0.0001291	-5.14e-05	-0.0002029	-0.0001869	-7.65e-05	-4.62e-05	-0.0001468	-0.0002494	-0.000557	-0.0001259	-0.0003203	-0.0001773	0.0001918	-0.0010837	-0.0003116
BC	0.0054016	0.0036269	0.0034345	0.0021019	-0.0027174	-0.001288	0.0015791	0.0018698	0.0045426	-0.0004493	0.0038581	0.0018134	0.0011215	0.0012372	-0.0004616	0.0006635	-6.13e-05	-0.0001272	-9.85e-05	-5.83e-05	-1.67e-05	-0.0001819	-0.0004012	0.0001858	-0.0001628	-0.0002375	-3.22e-05	-0.0003399	-0.0001696	0.0002855	-0.0012319	-0.0001399
